# Supplementary material for: ProNGF, a cytokine induced after myocardial infarction in humans, targets pericytes to promote microvascular damage and activation
Source: PubMed Central journal article supplement — J Exp Med. 2012 Nov 19;209(12):2291–305. doi: 10.1084/jem.20111749 (PMC3501352; doi:10.1084/jem.20111749), 2012-11-19
Supplement: supp_jem.20111749_JEM_20111749_sm.pdf [file supp_jem.20111749_JEM_20111749_sm.pdf]

## SUPPLEMENTAL MATERIAL

Siao et al. <http://www.jem.org/cgi/content/full/jem.20111749/DC1>**Table S1.** Patient information

| Head     | Number | Age                  | Gender (male/female) | Cause of death                                                                                                                                                                                                                                                 |
|----------|--------|----------------------|----------------------|----------------------------------------------------------------------------------------------------------------------------------------------------------------------------------------------------------------------------------------------------------------|
| MI       | 6      | <i>yr</i><br>57 ± 12 | 5/1                  | MI<br>duration: 12–24 h ( <i>n</i> = 1)<br>duration: 1–2 d ( <i>n</i> = 1)<br>duration: 3 d ( <i>n</i> = 2)<br>duration: 7–10 d ( <i>n</i> = 2)                                                                                                                |
| Controls | 5      | 63 ± 11              | 3/2                  | HIV, valvular insufficiency ( <i>n</i> = 1)<br>idiopathic valvular insufficiency ( <i>n</i> = 1)<br>multiple sclerosis, sepsis ( <i>n</i> = 1)<br>acute lymphocytic leukemia ( <i>n</i> = 1)<br>supranuclear palsy and urinary tract infection ( <i>n</i> = 1) |
